# Supplementary material
Source: PubMed Central journal article supplement (PMC4157145)
Supplement: mmc1.pdf [file mmc1.pdf]

The American Journal of Human Genetics, Volume 95

Supplemental Data

## **Mutations in *FEZF1* Cause Kallmann Syndrome**

**L. Damla Kotan, B. Ian Hutchins, Yusuf Ozkan, Fatma Demirel, Hudson Stoner, Paul J. Cheng, Ihsan Esen, Fatih Gurbuz, Y. Kenan Bicakci, Eda Mengen, Bilgin Yuksel, Susan Wray, and A. Kemal Topaloglu**

T T A A C C C G T **C** A C A T G C C A G

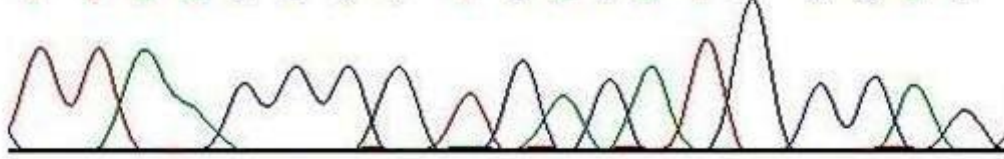

C T T A A C C C G T **T** A C A T G C C A G T

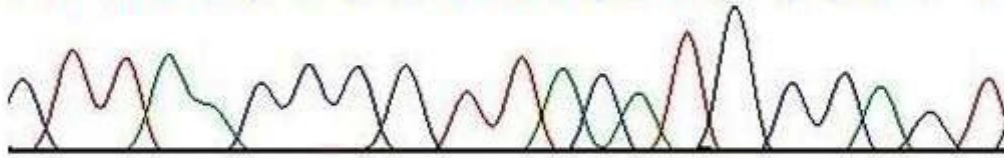

C T T A A C C C G T **C** A C A T G C C A G T

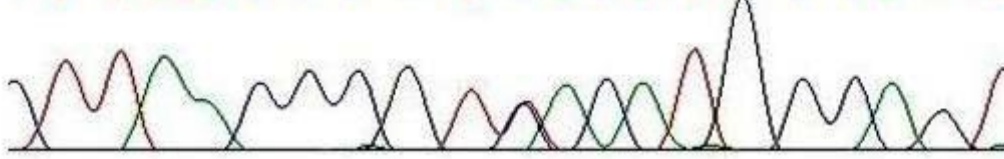

G G A G T A G C T T **T** C A A A G A C C T G

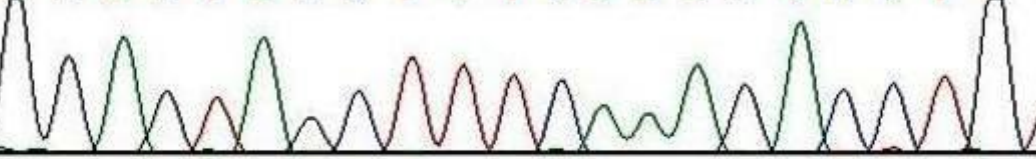

G G A G T A G C T **T** C A A A G A C C T G

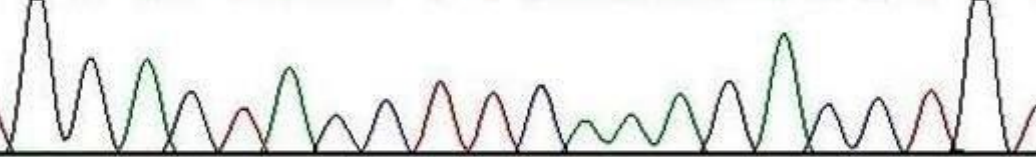

T G G A G T A G C T **T** C A A A G A A C T G G

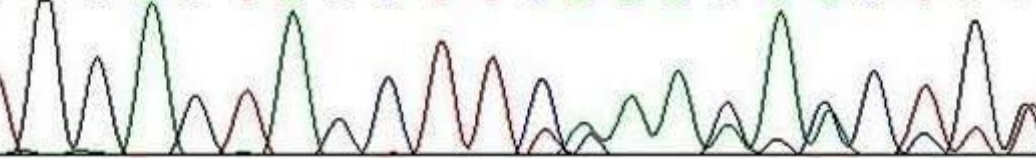

**Figure S1. *FEZF1* mutations in two families.** Figure 1 shows results of genotype sequencing of *FEZF1*. Top picture shows *FEZF1* mutation (c.832C>T) in Family 1. Bottom picture shows *FEZF1* mutation (c.651delT) in Family 2. In each picture top lines show homozygous wild-type genotype (healthy control individual), middle line shows homozygous mutant genotype (proband), and bottom line shows heterozygous genotypes.
